# Supplementary material
Source: MDPI journal article supplement (https://www.mdpi.com/2075-4701/13/1/172)
Supplement: s1 [file s1]

## Article

# Rapid Electrodeposition and Corrosion Behavior of Zn Coating from a Designed Deep Eutectic Solvent

Jiayi Chen <sup>1,2</sup>, Mengjun Zhu <sup>1,2</sup>, Mingtao Gan <sup>1,2</sup>, Xiuli Wang <sup>1,2</sup>, Changdong Gu <sup>1,2,\*</sup> and Jiangping Tu <sup>1,2</sup>

<sup>1</sup> School of Materials Science and Engineering, State Key Laboratory of Silicon Materials, Zhejiang University, Hangzhou 310027, China

<sup>2</sup> Key Laboratory of Advanced Materials and Applications for Batteries of Zhejiang Province, Hangzhou 310027, China

<sup>3</sup> Zhejiang Environment Monitoring Center, Hangzhou 310012, China

<sup>4</sup> Zhejiang Key Laboratory of Ecological and Environmental Monitoring, Forewarning and Quality Control, Hangzhou 310012, China

\* Correspondence: cdgu@zju.edu.cn; Tel.: +86-13454164563

## Supporting Information

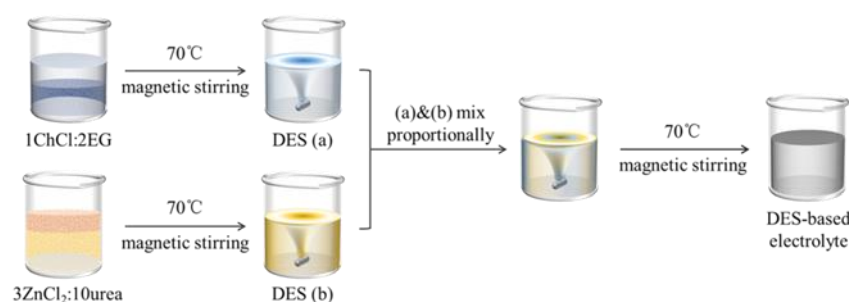

**Figure S1.** The schematic diagram of the electrolyte preparation process.

**Table S1.** A comparison of electrodeposition rates of ChCl-based DES in previously published work.

| Composition of DES Electrolyte                                                 |                         | Electrodeposition Parameters  |                        | Electrodeposition Rate<br>( $\mu\text{m/h}$ ) | Ref.      |
|--------------------------------------------------------------------------------|-------------------------|-------------------------------|------------------------|-----------------------------------------------|-----------|
| 1ChCl: 2EG, 800<br>mM sulfamic acid                                            | 40 mM RuCl <sub>3</sub> | 80 °C, 10 mA/cm <sup>2</sup>  | no stirring            | 0.75                                          | [17]      |
|                                                                                | 20 mM RuCl <sub>3</sub> |                               | no stirring            | 0.25                                          |           |
|                                                                                | 40 mM RuCl <sub>3</sub> |                               | 800 rpm                | 1                                             |           |
| ChCl:EG:FeCl <sub>2</sub> ·4H <sub>2</sub> O = 10 g:10 g:15 g                  |                         | 100 °C                        | 133 mA/cm <sup>2</sup> | 119                                           | [24]      |
|                                                                                |                         |                               | 67 mA/cm <sup>2</sup>  | 57                                            |           |
| 1ChCl: 2EG, 0.4 M ZnCl <sub>2</sub>                                            |                         | 80 °C, 3.3 mA/cm <sup>2</sup> |                        | 5.5                                           | [33]      |
| 1ChCl: 2EG, 1 M NiCl <sub>2</sub> ·6H <sub>2</sub> O                           |                         | 25 ± 3 °C, 1 V                |                        | 1.1                                           | [34]      |
| 1ChCl: 2urea, 0.1 M NiCl <sub>2</sub> , 0.4 M ZnCl <sub>2</sub>                |                         | 70 °C, 0.6 V                  |                        | 1.26                                          | [35]      |
| 1ChCl: 2urea, 0.5 M ZnCl <sub>2</sub>                                          |                         | 60 °C, 5 mA/cm <sup>2</sup>   |                        | 5.7                                           | [36]      |
| [1ChCl: 2EG + 3ZnCl <sub>2</sub> : 10urea]<br>Containing 2 M ZnCl <sub>2</sub> |                         | 28 °C, 4 mA/cm <sup>2</sup>   |                        | 58.8                                          | This work |
